# Supplementary material
Source: PubMed Central journal article supplement (PMC6599557)
Supplement: NIHMS1519434-supplement-1.pdf [file NIHMS1519434-supplement-1.pdf]

**Supplemental Table 1.** Correlation matrix of NH characteristics

|                                   |                                      | 1     | 2     | 3     | 4     | 5     | 6     | 7     | 8     | 9     | 10    | 11    | 12    | 13    | 14    | 15    | 16   |
|-----------------------------------|--------------------------------------|-------|-------|-------|-------|-------|-------|-------|-------|-------|-------|-------|-------|-------|-------|-------|------|
| <i>PROVEN Engagement</i>          | 1. Champion turnover                 | 1.00  |       |       |       |       |       |       |       |       |       |       |       |       |       |       |      |
|                                   | 2. Check-in call attendance          | 0.12  | 1.00  |       |       |       |       |       |       |       |       |       |       |       |       |       |      |
| <i>Structural characteristics</i> | 3. Total Social Workers/100 beds     | 0.05  | -0.28 | 1.00  |       |       |       |       |       |       |       |       |       |       |       |       |      |
|                                   | 4. Bed size 120+                     | 0.01  | -0.05 | -0.03 | 1.00  |       |       |       |       |       |       |       |       |       |       |       |      |
| <i>Resident composition</i>       | 5. % intact (CFS=1)                  | 0.16  | -0.17 | 0.33  | -0.07 | 1.00  |       |       |       |       |       |       |       |       |       |       |      |
|                                   | 6. % mild/moderate (CFS=2,3)         | -0.14 | 0.09  | -0.12 | 0.06  | -0.69 | 1.00  |       |       |       |       |       |       |       |       |       |      |
|                                   | 7. % severe (CFS=4)                  | -0.02 | 0.09  | -0.27 | 0.02  | -0.34 | -0.44 | 1.00  |       |       |       |       |       |       |       |       |      |
|                                   | 8. % Under 65                        | 0.20  | 0.03  | -0.20 | 0.17  | 0.18  | -0.16 | -0.02 | 1.00  |       |       |       |       |       |       |       |      |
|                                   | 9. Admissions per bed                | -0.14 | -0.15 | 0.49  | 0.03  | 0.22  | -0.02 | -0.24 | -0.34 | 1.00  |       |       |       |       |       |       |      |
|                                   | 10. Occupancy %                      | -0.28 | -0.09 | 0.15  | -0.16 | -0.15 | 0.14  | 0.00  | -0.25 | 0.19  | 1.00  |       |       |       |       |       |      |
| <i>Quality</i>                    | 11. Medicaid %                       | 0.15  | 0.22  | -0.40 | 0.00  | -0.17 | 0.04  | 0.17  | 0.47  | -0.67 | 0.04  | 1.00  |       |       |       |       |      |
|                                   | 12. Hospitalizations per year (2015) | 0.09  | 0.02  | 0.10  | 0.10  | 0.08  | 0.03  | -0.13 | 0.26  | 0.41  | 0.04  | -0.03 | 1.00  |       |       |       |      |
|                                   | 13. 1 star                           | 0.21  | -0.07 | -0.03 | 0.25  | -0.19 | 0.16  | 0.03  | 0.27  | -0.07 | -0.02 | 0.15  | 0.27  | 1.00  |       |       |      |
|                                   | 14. 2/3 star                         | -0.08 | -0.03 | -0.07 | -0.09 | 0.06  | -0.09 | 0.05  | -0.02 | -0.07 | -0.11 | -0.04 | -0.10 | -0.44 | 1.00  |       |      |
|                                   | 15. 4/5 stars                        | -0.08 | 0.08  | 0.09  | -0.11 | 0.09  | -0.03 | -0.07 | -0.19 | 0.13  | 0.14  | -0.08 | -0.12 | -0.34 | -0.70 | 1.00  |      |
|                                   | 16. Any Penalty                      | 0.04  | 0.13  | -0.05 | 0.08  | 0.02  | -0.04 | 0.03  | -0.04 | 0.16  | -0.19 | -0.11 | 0.12  | 0.10  | 0.04  | -0.12 | 1.00 |

Notes: Cognitive function scale (CFS); Overall star rating from quarter 1, 2016; Any penalty in 2016
